# Supplementary material
Source: publisher figshare collection journal article supplement (https://acs.figshare.com/ndownloader/files/19815422)
Supplement: Supplementary file 1 [file 19815422]

## Supporting Information

### **Reversible Adhesion via Light-Regulated Conformations of Rubber Chains**

Xin Wang<sup>†</sup>, Di Tan<sup>†</sup>, Shiqi Hu<sup>†</sup>, Qian Li<sup>†</sup>, Baisong Yang<sup>†</sup>, Zhekun Shi<sup>†</sup>, Rakesh Das<sup>†</sup>, Xinliang Xu<sup>†</sup>, Zhong-Shuai Wu<sup>‡</sup> and Longjian Xue<sup>\*,†</sup>

<sup>†</sup>School of Power and Mechanical Engineering, The Institute of Technological Science, Wuhan University, South Donghu Road 8, 430072, Wuhan, China

<sup>‡</sup>Dalian National Laboratory for Clean Energy, Dalian Institute of Chemical Physics Chinese Academy of Sciences, 457 Zhongshan Road, Dalian 116023, China

\*Tel.: +0086-27-68774066. Email: [xuelongjian@whu.edu.cn](mailto:xuelongjian@whu.edu.cn)

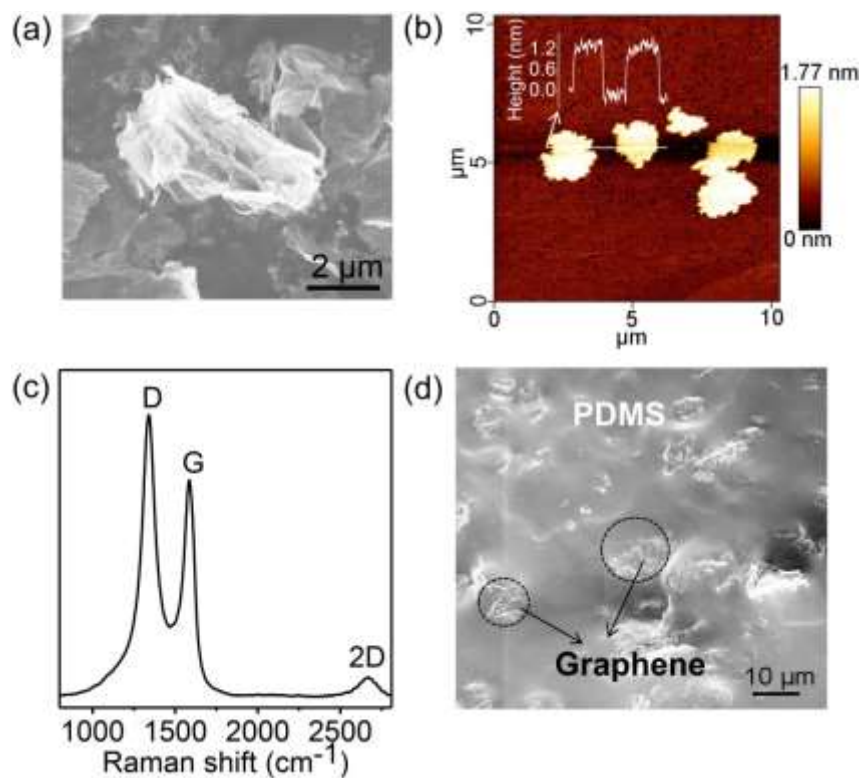

**Figure S1.** Characterization of graphene sheet and the mixture of PDMS and graphene sheets (GP). (a) SEM, (b) AFM and (c) Raman spectrum of graphene sheets. Inset in (b) shows the thickness profile of graphene sheet. (d) SEM image of GP. The dash circles mark the positions of graphene sheets while the rest flat area is the PDMS matrix.

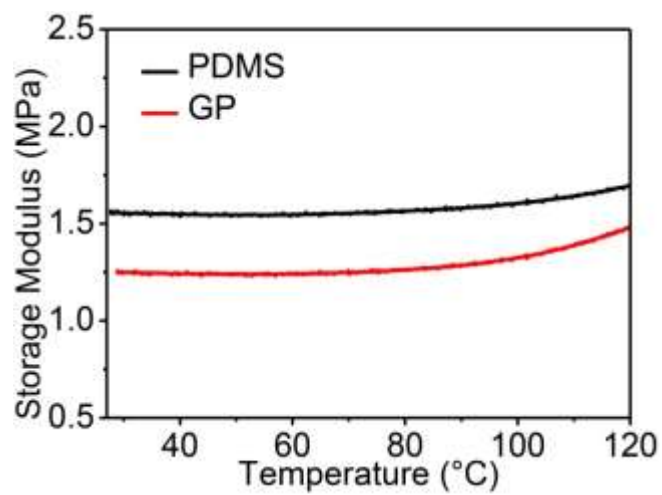

**Figure S2.** Dependences of elastic modulus of PDMS and GP (0.8 wt % of graphene in GP) with temperature ranging from RT to 120 °C.

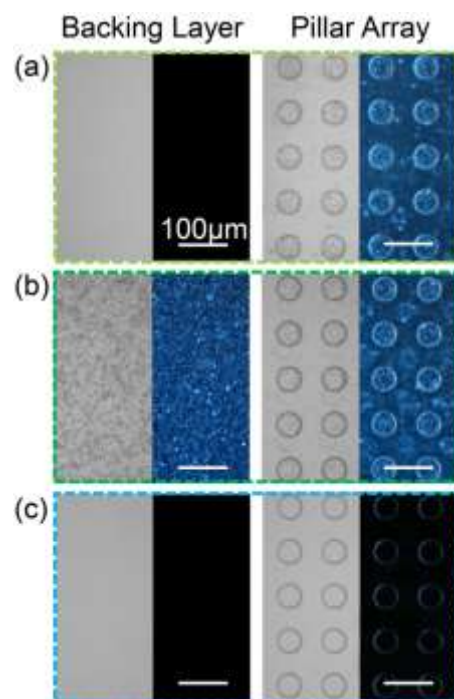

**Figure S3.** Optical image of the backing layer and the pillar array of (a) B<sub>P</sub>P<sub>G</sub>, (b) B<sub>G</sub>P<sub>G</sub> and (c) B<sub>P</sub>P<sub>P</sub> under light field (left) and dark-field (right) illuminations.

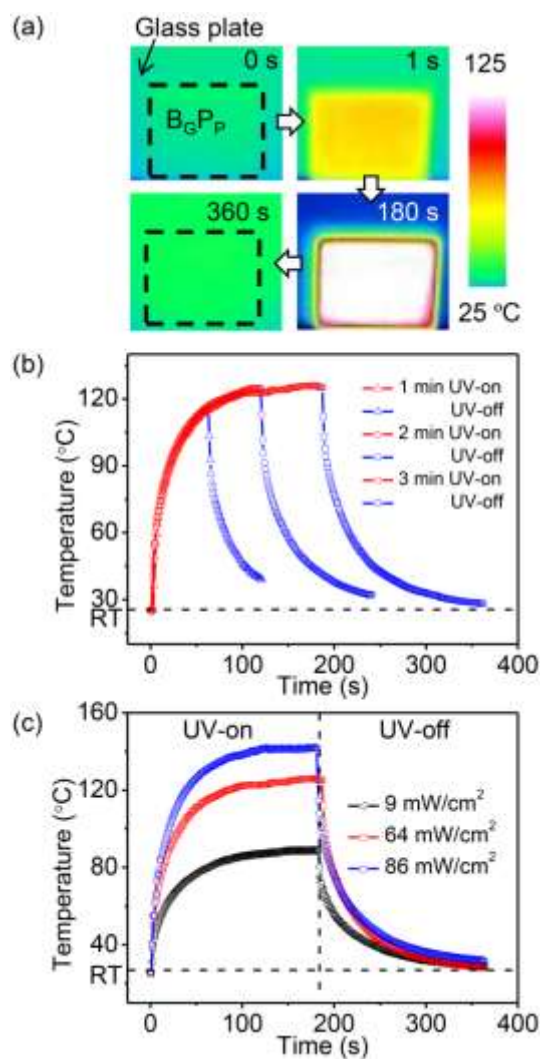

**Figure S4** (a) Infrared images of BGPp under UV irradiation with 3 min UV irradiation and 3 min UV-off. (b-c) Dependence of UV-induced temperature change at the centre of the BGPp on (b) the period of on-off cycles and (c) the light intensity. The light intensity in (a) and (b) is 64 mW/cm<sup>2</sup>.

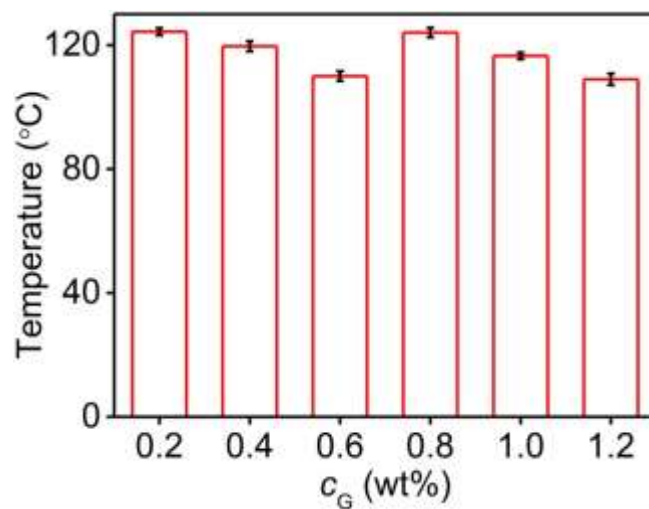

**Figure S5.** Dependence of temperatures of B<sub>G</sub>P at the UV-on state on the concentration of graphene ( $c_G$ ) in GP. Error bars indicate the standard deviation.

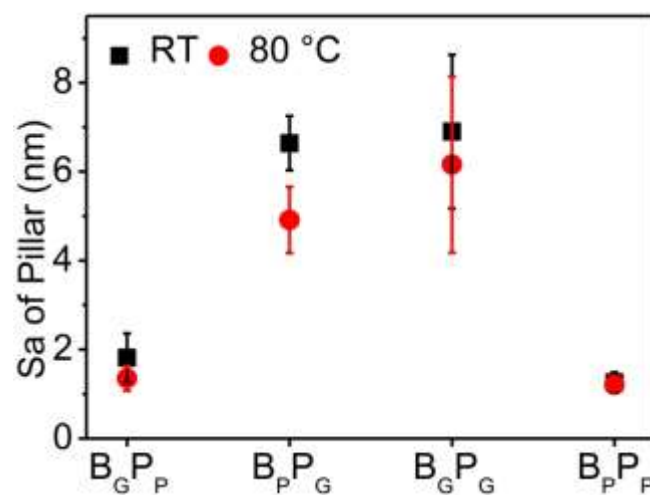

**Figure S6.** *Sa* roughness of pillar tip on different adhesives at RT and 80 °C. Error bars indicate the standard deviation.

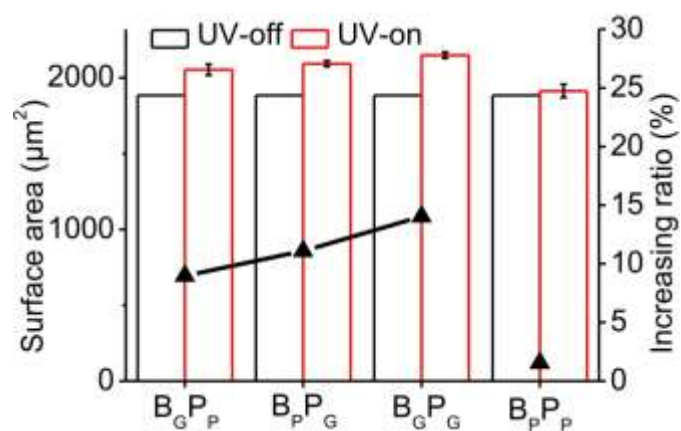

**Figure S7.** Surface areas of pillar tip in different adhesives under UV on and off states. Error bars indicate the standard deviation.



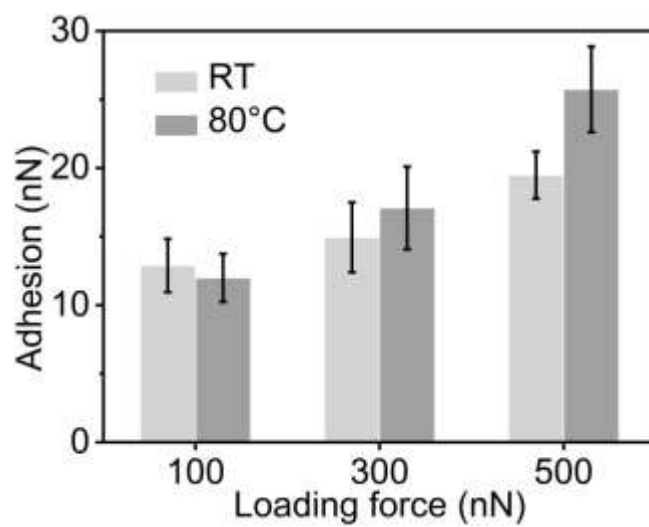

**Figure S8.** Nanoscale adhesion of PDMS surface with different loading forces. The mixing ratio of PDMS is 10:1. Error bars indicate the standard deviation.

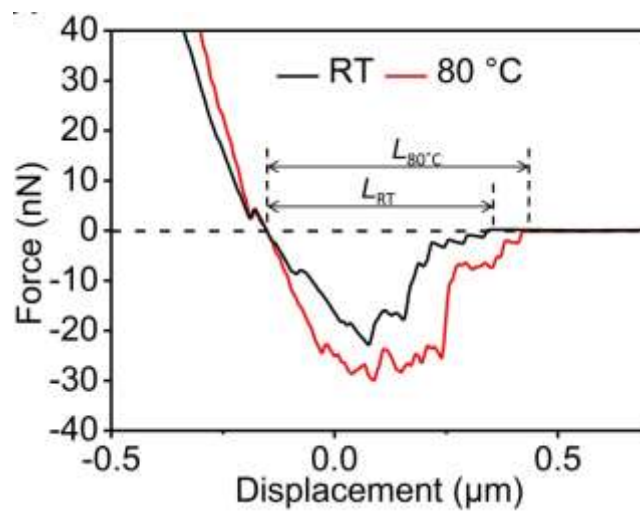

**Figure S9.** Retraction curve of PDMS measured with AFM at RT and 80 °C. Detaching distance ( $L$ ) at RT and 80 °C are indicated.

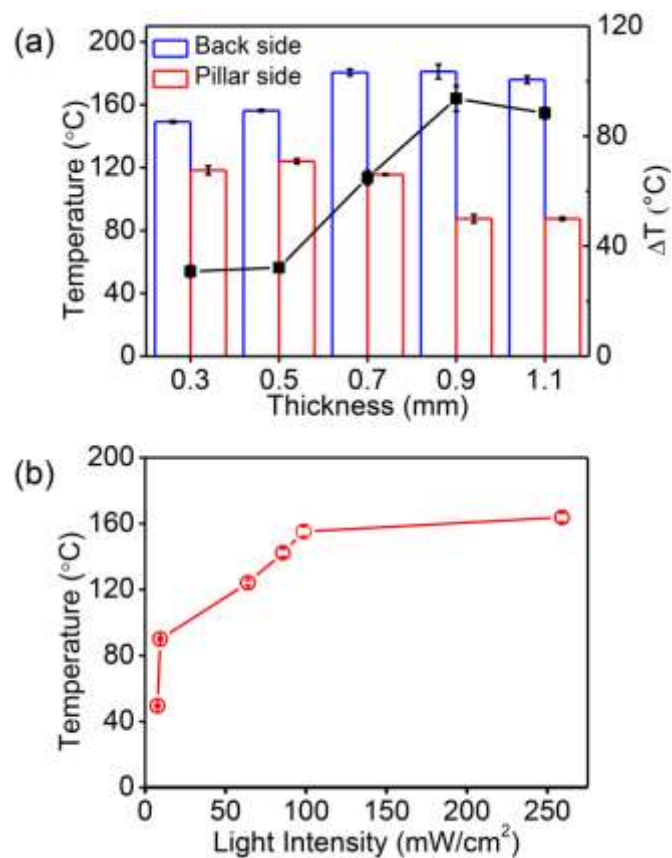

**Figure S10.** (a) Dependence of temperatures of both sides of BGPp under UV irradiation on the thickness of BGPp. (b) Dependence of temperature of BGPp at the UV-on state on the intensity of UV light. Error bars in (a) and (b) indicate the standard deviation.

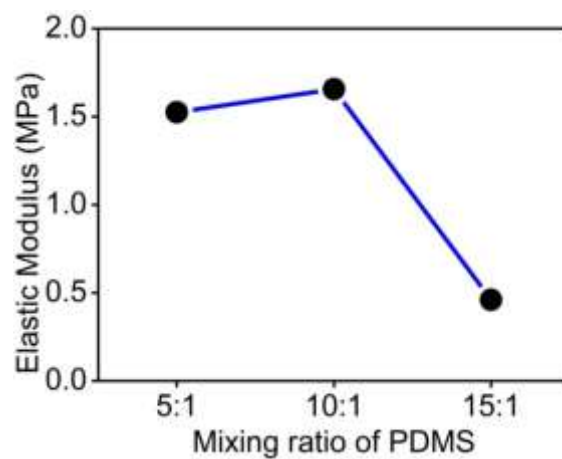

**Figure S11.** Dependence of elastic modulus of PDMS on the mixing ratio of base to cross-linker for PDMS.
